# Supplementary material for: Facile formulation of alkaline-developable positive-type photosensitive polyimide based on fluorinated poly(amic acid), poly(amic acid), and fluorinated diazonaphthoquinone
Source: Royal Society of Chemistry journal article supplement (doi:10.1039/c3tc00324h), 2013-01-01
Supplement: c3tc00324h.pdf [file c3tc00324h.pdf]

## Supporting Information

# Alkaline-developable Positive-type Photosensitive Polyimide Based on Fluorinated Poly(amic acid) Poly(amic acid), and Fluorinated Diazonaphthoquinone

*Yusuke Inoue, Yuta Saito, Tomoya Higashihara, and Mitsuru Ueda\**

*Department of Organic and Polymeric Materials, Graduate School of Science and Engineering, Tokyo  
Institute of Technology, 2-12-1-H-120, O-okayama, Meguro-Ku, Tokyo 152-8552, Japan*

\*To whom correspondence should be addressed. Telephone: +81-3-57342127. Fax: +81-3-57342127. E-mail:  
[ueda.m.ad@m.titech.ac.jp](mailto:ueda.m.ad@m.titech.ac.jp)

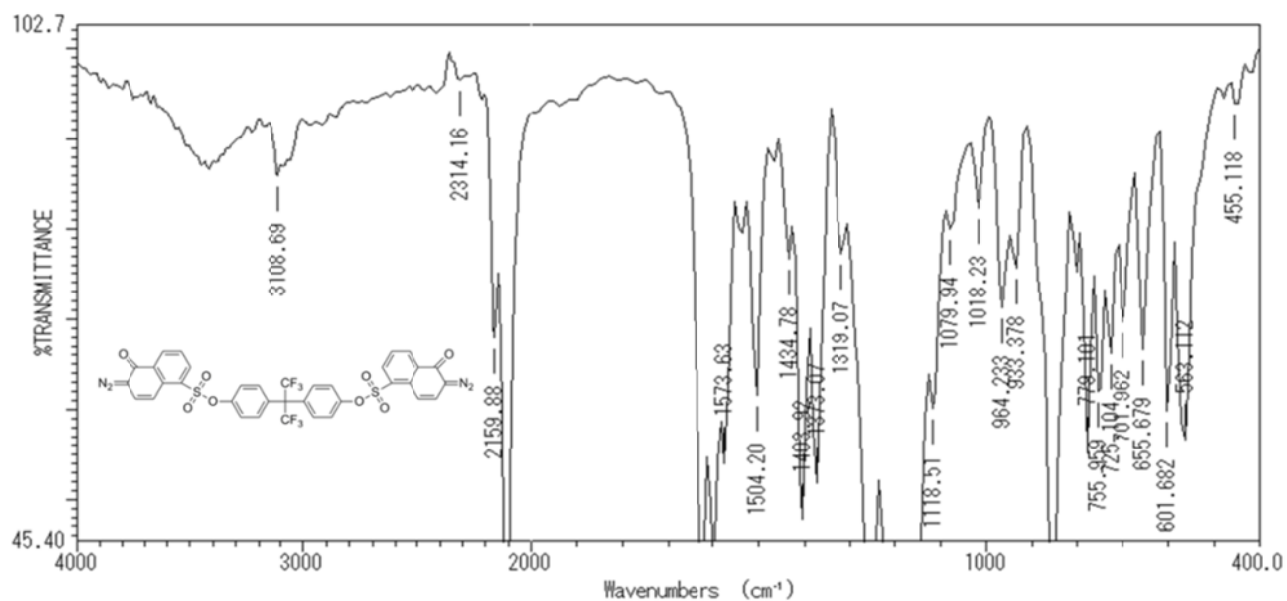

**Figure S1.** IR spectrum of FDNQ-1.

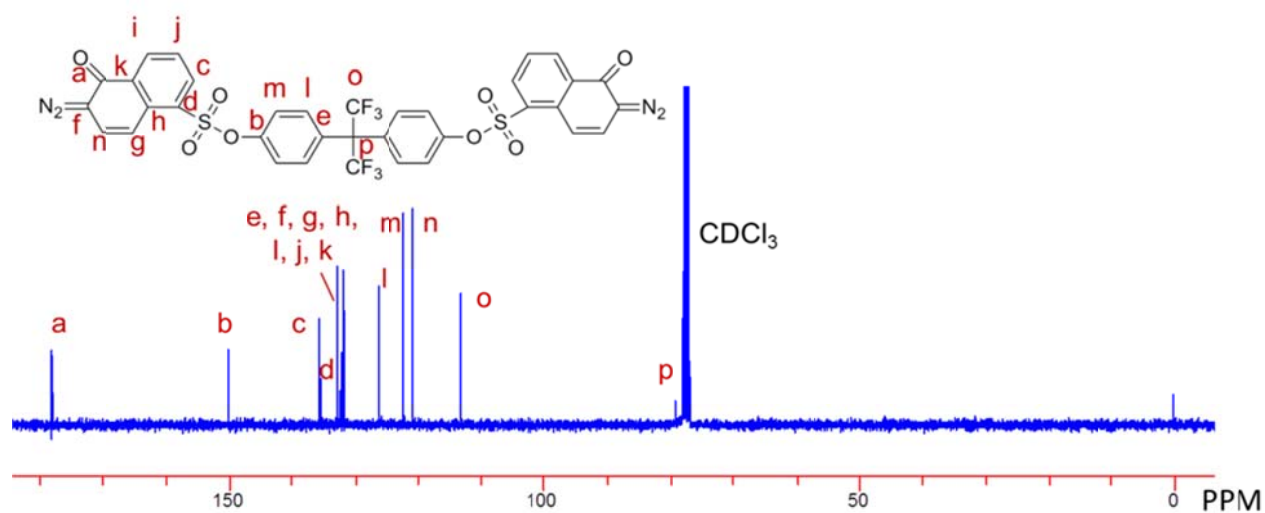

**Figure S2.** <sup>13</sup>C NMR spectrum of FDNQ-1.

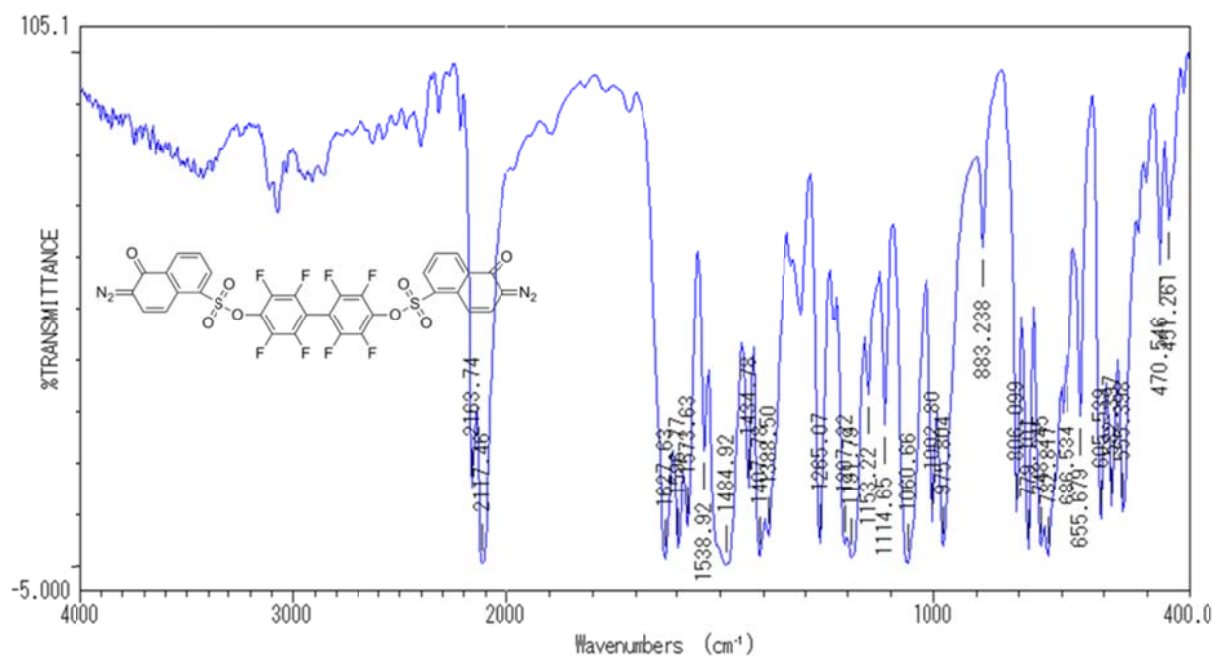

**Figure S3.** IR spectrum of FDNQ-2.

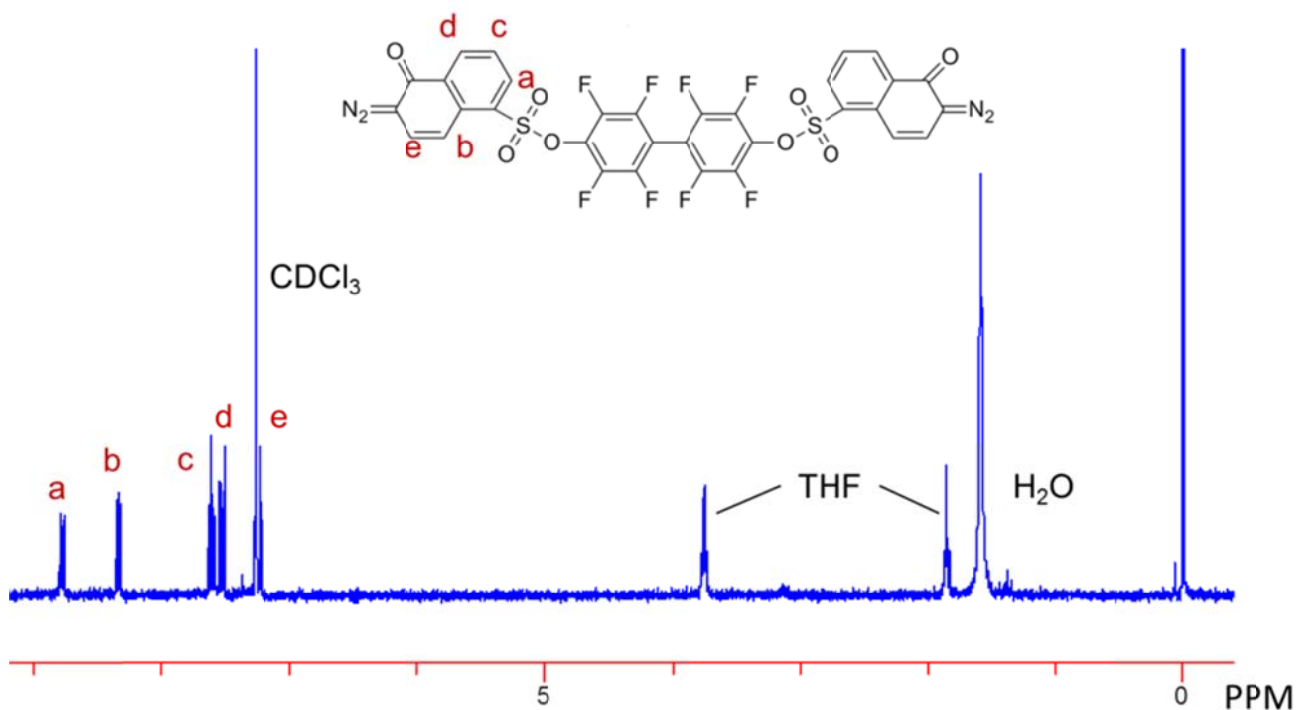

**Figure S4.** <sup>1</sup>H NMR spectrum of FDNQ-2.

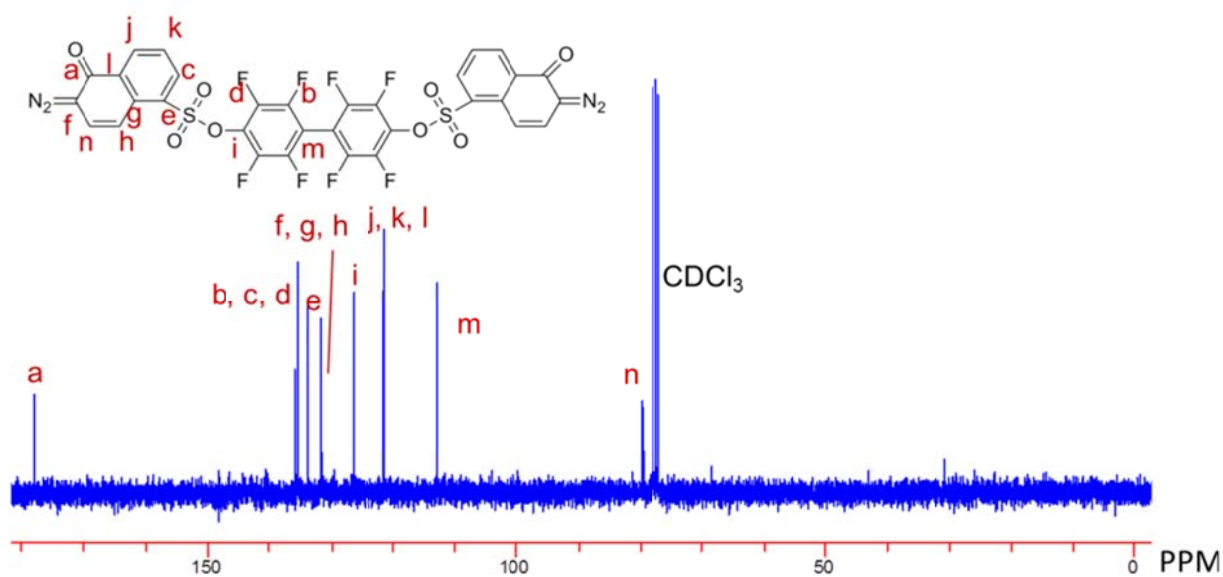

**Figure S5.** <sup>13</sup>C NMR spectrum of FDNQ-2.

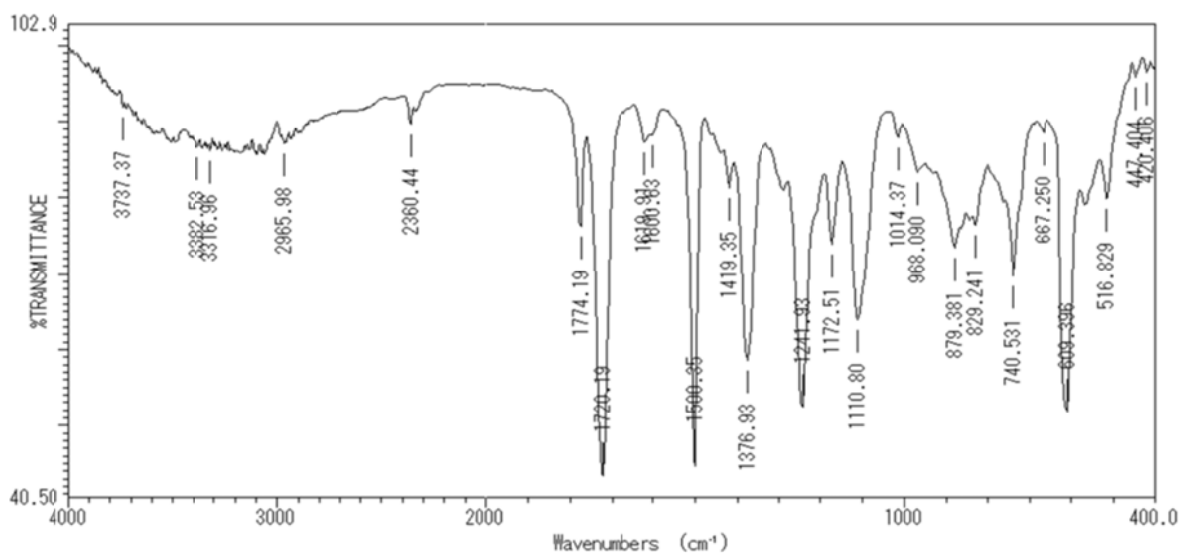

**Figure S6.** FT-IR spectrum of the PI film.
